# Supplementary material
Source: publisher figshare collection journal article supplement (https://acs.figshare.com/ndownloader/files/28004483)
Supplement: Supplementary file 1 [file 28004483]

## Supporting Information

### Compositional Variation in Hybrid Organic-Inorganic Lead Halide Perovskites: Kinetically- versus Thermodynamically-controlled Synthesis

Jiyu Tian<sup>1,2</sup>, Eli Zysman-Colman<sup>2,\*</sup> and Finlay D. Morrison<sup>1,\*</sup>

<sup>1</sup>*EaStCHEM School of Chemistry, University of St Andrews, St Andrews, Fife, KY16 9ST, United Kingdom.*

<sup>2</sup>*Organic Semiconductor Centre, EaStCHEM School of Chemistry, University of St Andrews, St Andrews, Fife, KY16 9ST, United Kingdom.*

## Table of Contents

|                                                                                              |                  |
|----------------------------------------------------------------------------------------------|------------------|
| <b><i>Crystallite size estimation using the Scherrer equation .....</i></b>                  | <b><i>3</i></b>  |
| <b><i>Determination of the molar ratio of A-cation in as-synthesised perovskite.....</i></b> | <b><i>5</i></b>  |
| <b><i>Step antisolvent precipitation synthesis.....</i></b>                                  | <b><i>8</i></b>  |
| <b><i>References.....</i></b>                                                                | <b><i>16</i></b> |

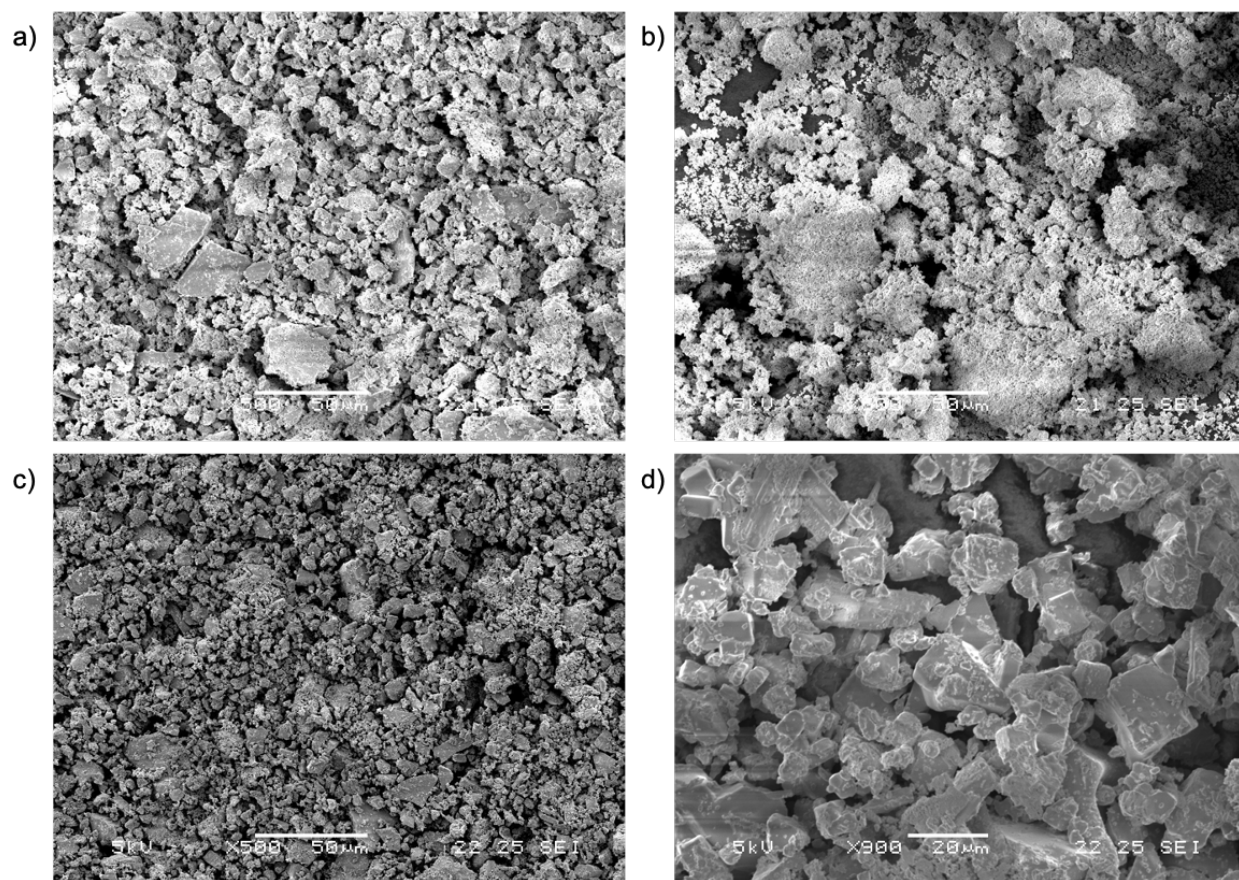

Figure S1. SEM images of  $\text{AzPbBr}_3$  from a) mechano- b) precipitation synthesis and  $\text{FAPbBr}_3$  from c) mechano- d) precipitation synthesis. The white scale bar is  $20\text{ }\mu\text{m}$  for image d) while scale bar in other images is  $50\text{ }\mu\text{m}$ .

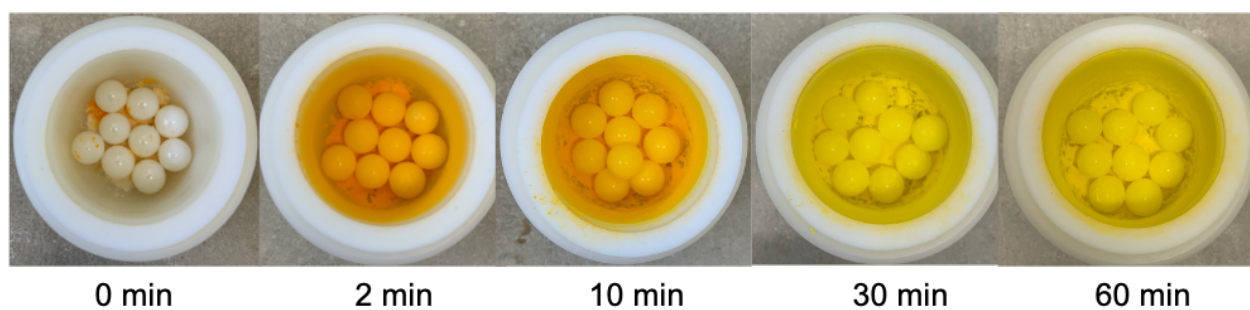

Figure S2. Photos of color progression of  $\text{Az}_{0.5}\text{FA}_{0.5}\text{PbBr}_3$  during mechanosynthesis.

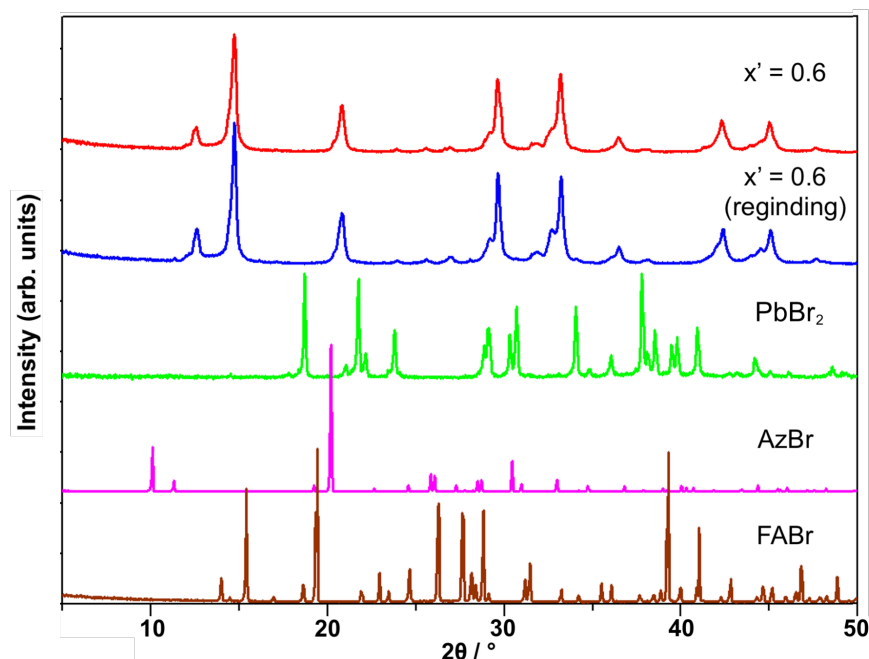

Figure S3. PXRD of mechano-synthesised  $\text{Az}_{0.4}\text{FA}_{0.6}\text{PbBr}_3$  before and after regrinding for an additional hour and PXRD of starting materials  $\text{PbBr}_2$ ,  $\text{AzBr}$  and  $\text{FAPbBr}_3$ .

No trace of starting materials is observed in samples before and after regrinding. Reground samples showed no visual change in appearance and Rietveld refinement indicated an insignificant change (within error) in both phase fraction (cubic phase ratio from 0.436 to 0.453) and lattice parameters of 6H (~1% change) and 3C (~2% change) phase. These analyses suggest all starting materials were consumed during mechano-synthesis.

### Crystallite size estimation using the Scherrer equation

Analysis of PXRD data using the Scherrer equation was used to estimate the particle/crystallite size of  $\text{Az}_{1-x}\text{FA}_x\text{PbBr}_3$  powders according to:<sup>1</sup>

$$p = \frac{K\lambda}{b \cos \theta} \quad (\text{Eq. 1})$$

where  $p$  is the mean crystallite size,  $K$  is Scherrer (shape) constant,  $\lambda$  is the X-ray wavelength (1.5406 Å),  $b$  is the breadth at full-width at half maximum intensity (FWHM), in radians,  $\theta$  is Bragg angle. The Scherrer equation analysis on 6H phase is shown in Table S1. The FWHM of the high intensity (011) peak was chosen for the analysis. The shape constant was set to 0.9 as the symmetry of the corresponding crystallite is hexagonal (non-cubic).<sup>1</sup>

Table S1. Calculation of crystallite size of 6H phase in the mix-cation  $Az_{1-x}FA_xPbBr_3$  ( $x \leq 0.8$ ) perovskite and  $FAPbBr_3$  ( $x = 1$ ) in both mechano- and precipitation synthesis using the Scherrer equation.

| Grinding |                                      |                 |                | Precipitation |                                      |                 |                |
|----------|--------------------------------------|-----------------|----------------|---------------|--------------------------------------|-----------------|----------------|
| $x$      | Peak position( $2\theta$ )/ $^\circ$ | FWHM / $^\circ$ | L / nm         | $x$           | Peak position( $2\theta$ )/ $^\circ$ | FWHM / $^\circ$ | L / nm         |
| 0        | 12.398                               | 0.185           | 43.2           | 0             | 12.417                               | 0.107           | 74.7           |
| 0.1      | 12.367                               | 0.332           | 24.1           | 0.1           | 12.376                               | 0.091           | 87.8           |
| 0.2      | 12.452                               | 0.264           | 30.3           | 0.2           | 12.423                               | 0.092           | 86.9           |
| 0.3      | 12.504                               | 0.224           | 35.7           | 0.3           | 12.385                               | 0.101           | 79.1           |
| 0.4      | 12.520                               | 0.382           | 20.9           | 0.4           | 12.442                               | 0.098           | 81.5           |
| 0.5      | 12.544                               | 0.316           | 25.3           | 0.5           | 12.401                               | 0.115           | 69.5           |
| 0.6      | 12.595                               | 0.357           | 22.4           | 0.6           | 12.416                               | 0.114           | 70.1           |
| 0.7      | 12.376                               | 0.236           | 33.9           | 0.7           | 12.390                               | 0.102           | 78.3           |
|          |                                      |                 |                | 0.8           | 12.456                               | 0.121           | 66.0           |
| Average  |                                      |                 | $28.8 \pm 7.7$ | Average       |                                      |                 | $77.1 \pm 7.7$ |
| 1        | 14.736                               | 0.080           | 100            | 1             | 14.760                               | 0.072           | 111            |

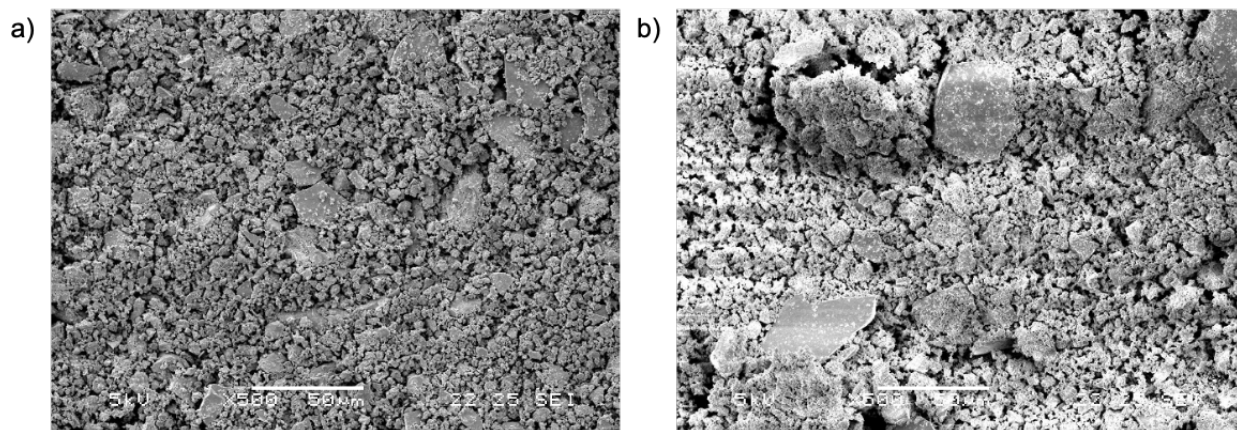

Figure S4. Examples of SEM images of  $\text{Az}_{0.6}\text{FA}_{0.4}\text{PbBr}_3$  from a) mechano- b) precipitation synthesis. The white scale bar is 50  $\mu\text{m}$  in both images.

#### Determination of the molar ratio of A-cation in as-synthesised perovskite

$^1\text{H}$  NMR was used to determine the molar ratio of the mixed-cation perovskite. The as-synthesised perovskite powder (ca. 60 mg) was dissolved in ca. 0.6 mL  $d_6$ -DMSO. The solutions were stirred at room temperature until the powder was dissolved. The solutions from precipitation synthesis were transferred into an NMR tubes while the solutions from mechano-synthesis were filtered to clear non-perovskite particles, such as polymer fibbers or micro-particles from the ball mill before the transfer. A dichlorobenzene internal standard (20  $\mu\text{L}$ ) was added by micropipette. The solution was mixed before the analysis. Before integration, the baseline was corrected using Whittaker Smoother method and the phase was corrected using the whitening algorithm. The peaks of standard reagent – dichlorobenzene was integrated first and normalized to 4.00 ( $4 \times ^1\text{H}$ ). Then, the peaks of  $\text{FA}^+$ ,  $\text{Az}^+$  were integrated as  $I_{\text{FA}^+}$ ,  $I_{\text{Az}^+}$ , respectively. One example of this procedure is shown in Figure S5b. The molar ratios of  $\text{FA}^+$  cation was calculated by the equation:

$$\alpha_{\text{FA}^+} = \frac{I_{\text{FA}^+}}{I_{\text{FA}^+} + I_{\text{Az}^+}/4} \quad (\text{Eq. 2})$$

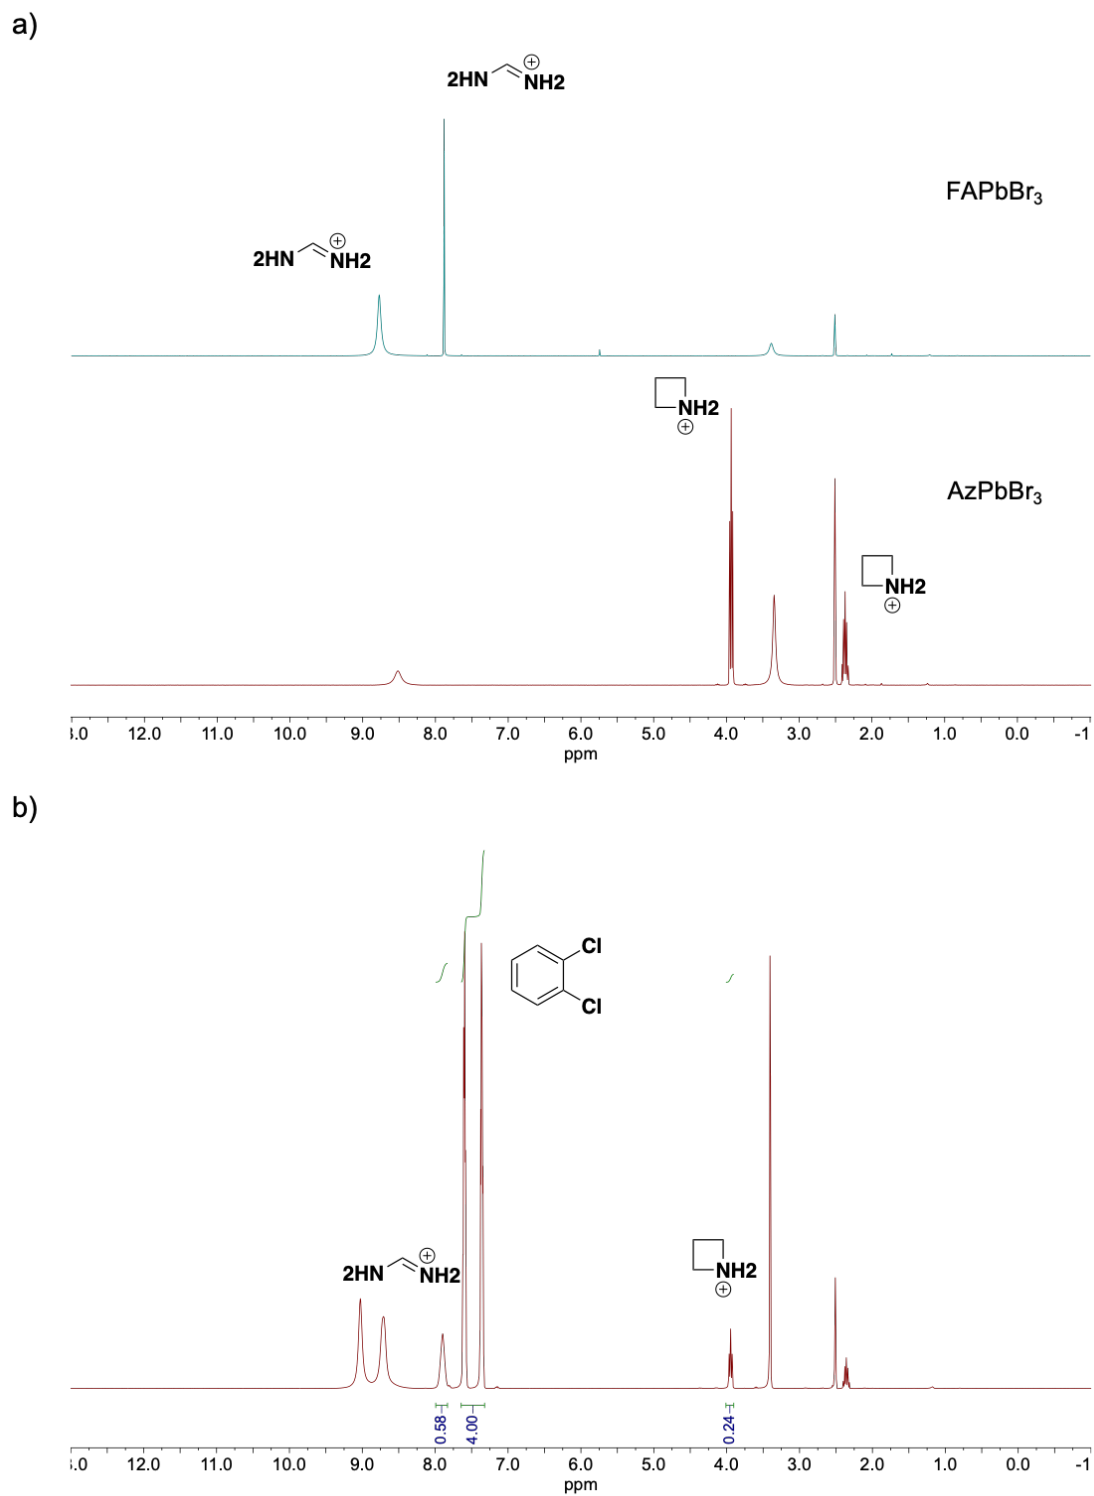

Figure S5. Example of the analysis by  $^1\text{H}$  NMR on a) AzPbBr<sub>3</sub> and FAPbBr<sub>3</sub> b) a mixed A-cation perovskite Az<sub>0.1</sub>FA<sub>0.9</sub>PbBr<sub>3</sub> in  $d_6$ -DMSO. Dichlorobenzene (20  $\mu\text{L}$ ) was used as the internal standard.

Table **S2**. Comparison of actual  $x$  in mechano-synthesis of  $\text{Az}_{1-x}\text{FA}_x\text{PbBr}_3$  between the powder removed from ball mill (actual  $x$ ) and powder left in ball mill (actual  $x$  - residue).

| Nominal $x'$ | Actual $x$ | Actual $x$ -<br>residue | Nominal $x'$ | Actual $x$ | Actual $x$ -<br>residue |
|--------------|------------|-------------------------|--------------|------------|-------------------------|
| 0.1          | 0.142      | 0.158                   | 0.8          | 0.799      | 0.800                   |
| 0.2          | 0.268      | 0.265                   | 0.9          | 0.906      | 0.900                   |
| 0.6          | 0.634      | 0.597                   |              |            |                         |

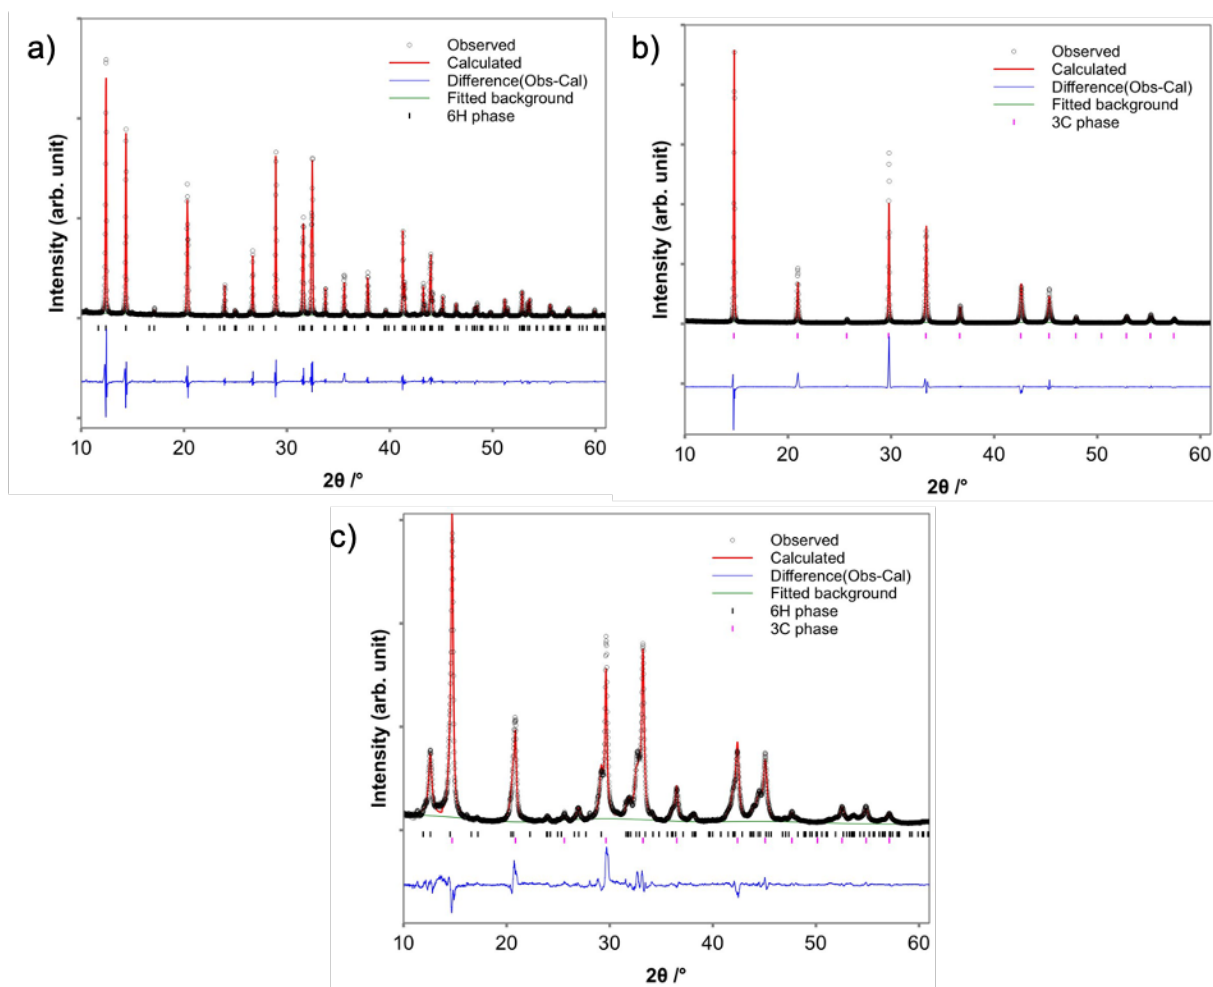

Figure S6. Examples of Rietveld refinement profile of PXRD data for a)  $\text{AzPbBr}_3$ , b)  $\text{FAPbBr}_3$  and c)  $\text{Az}_{0.4}\text{FA}_{0.6}\text{PbBr}_3$  with observed intensity (open circles), calculated intensity (red line), background (green line), reflection position (black bar for 6H phase and magenta bar for 3C phase) and difference curve (blue line).

### Step antisolvent precipitation synthesis

**Set 1:**  $\text{AzBr}$ ,  $\text{FABr}$  and  $\text{PbBr}_2$  were dissolved in DMF/DMSO (4:1) – 0.4 M where the nominal composition was  $\text{Az}_{0.5}\text{FA}_{0.5}\text{PbBr}_3$ . The solution was divided evenly into 5 sample vials after stirring. The volume of antisolvent (MeCN) added into the solution ranged from 1 mL, 2 mL, 5 mL, 10 mL to 20 mL (excess), The precipitates were dried in vacuum for 24 h before analysis.

**Set 2:**  $\text{AzBr}$ ,  $\text{FABr}$  and  $\text{PbBr}_2$  were dissolved in DMF/DMSO (4:1) – 0.4 M where the nominal composition was  $\text{Az}_{0.5}\text{FA}_{0.5}\text{PbBr}_3$ . The total amount, including rinsing and washing, of antisolvent



(MeCN) added into the solution was recorded. To obtain enough powder for the analysis, the total amount of antisolvent ranged from 1 mL, 7 mL, 16 mL to ca. 30 mL (excess). The extra volume of antisolvent was to compensate for the loss during vacuum filtration. The precipitates were dried in vacuum for 24 h before analysis.

Actual  $x$  was determined by  $^1\text{H}$  NMR and unit cell volume of the 6H phase is determined by Rietveld refinement.

**Table S3.** Actual  $x$  and 6H phase unit cell volume of set 1 and set 2 step antisolvent precipitation synthesis of  $\text{AZ}_{0.5}\text{FA}_{0.5}\text{PbBr}_3$ .

| Set 1               |            |                                   | Set 2               |            |                                   |
|---------------------|------------|-----------------------------------|---------------------|------------|-----------------------------------|
| Volume of MeCN / mL | Actual $x$ | Unit cell Volume / $\text{\AA}^3$ | Volume of MeCN / mL | Actual $x$ | Unit cell Volume / $\text{\AA}^3$ |
| 1                   | 0.025      | 1420.308                          | 1                   | 0.024      |                                   |
| 2                   | 0.044      | 1419.838                          | 7                   | 0.060      |                                   |
| 5                   | 0.063      | 1418.322                          | 16                  | 0.294      |                                   |
| 10                  | 0.171      | 1410.823                          | 30 (ex.)            | 0.803      | /                                 |
| 20 (ex.)            | 0.298      | 1419.055                          |                     |            |                                   |

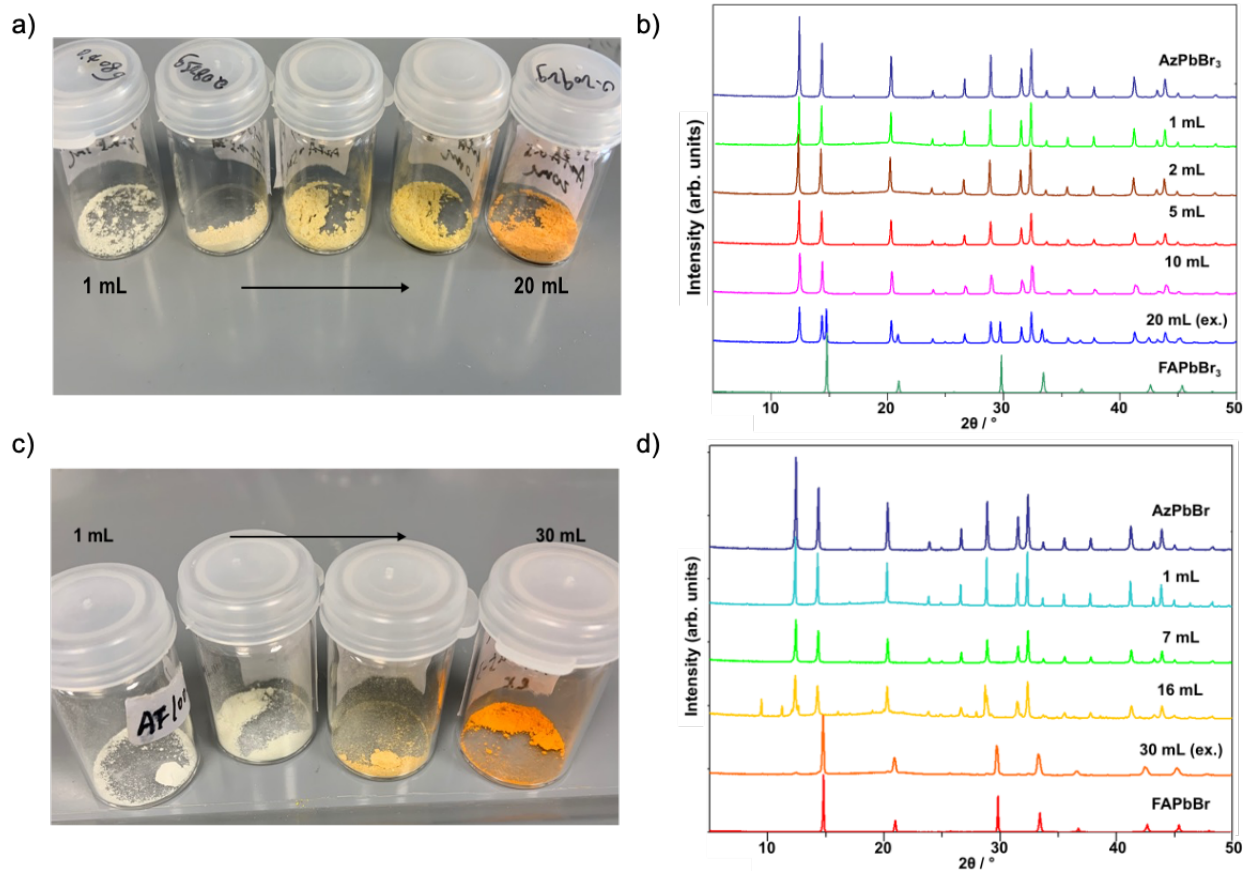

Figure S7. Step antisolvent precipitation synthesis of  $\text{Az}_{0.5}\text{FA}_{0.5}\text{PbBr}_3$  analysed by (a, c) PXRD; (b, d) visualisation of the color of the powder. (a, b) are from set 1 and (c, d) are from set 2.

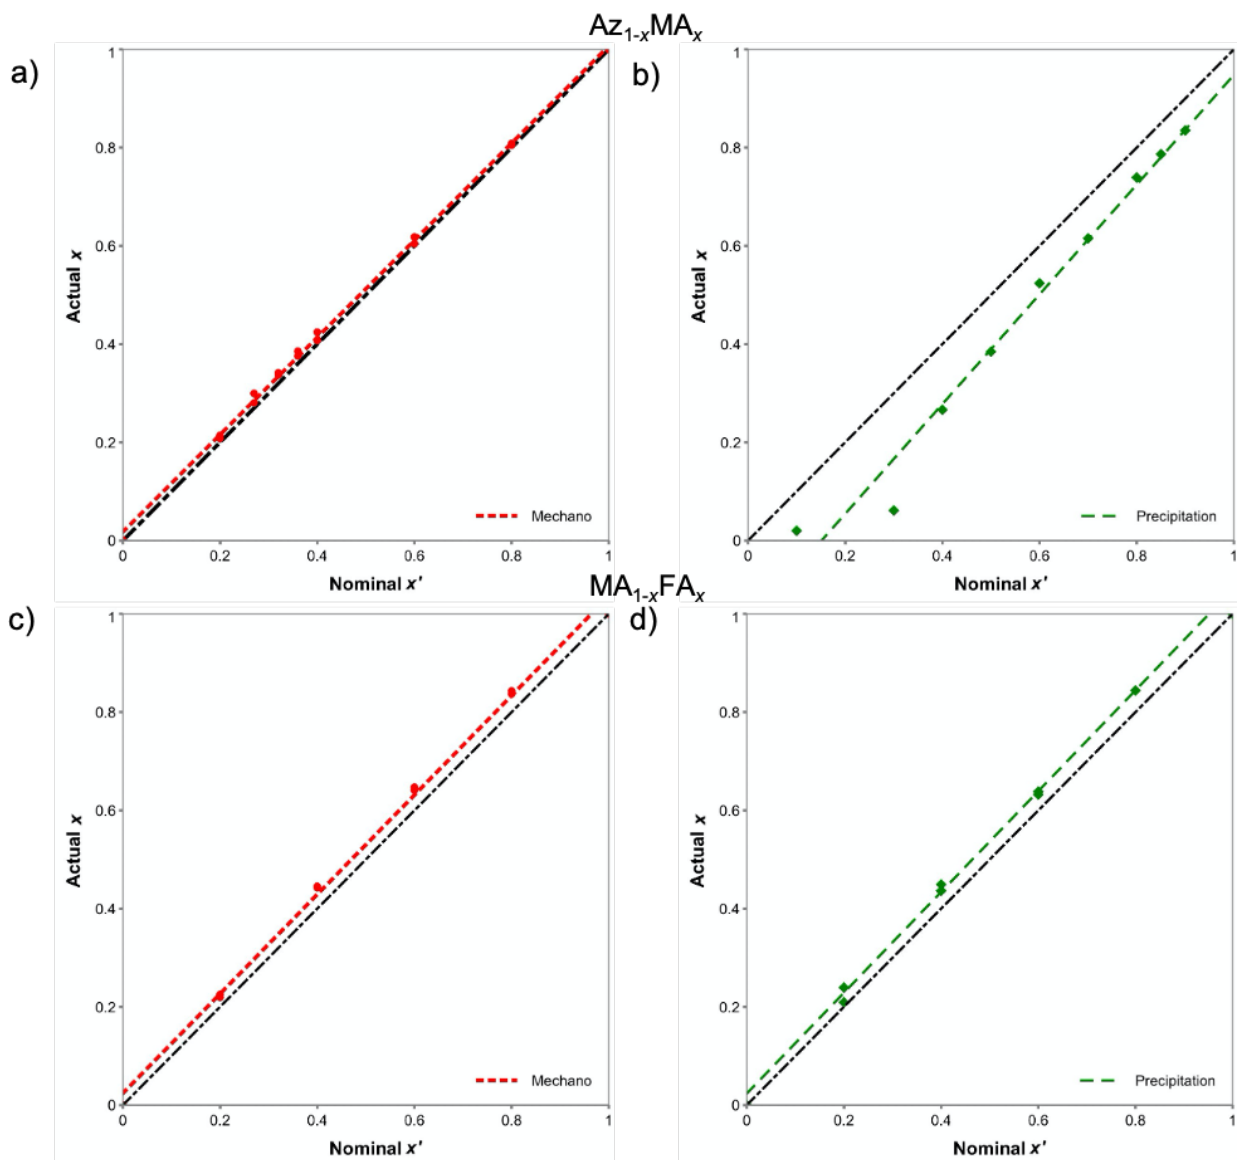

Figure S8. The comparison of nominal ( $x'$ ) and actual ( $x$ )  $\text{MA}^+/\text{FA}^+$  cation content determined by  $^1\text{H}$  NMR analysis in  $\text{Az}_{1-x}\text{MA}_x\text{PbBr}_3/\text{MA}_{1-x}\text{FA}_x\text{PbBr}_3$  ( $0 \leq x \leq 1$ ), respectively, prepared by (a, c) mechano-synthesis, and (b, d) precipitation synthesis. Dash lines are linear fit to the actual values and black dot-dash lines indicate the instance for  $x' = x$  composition for comparison.

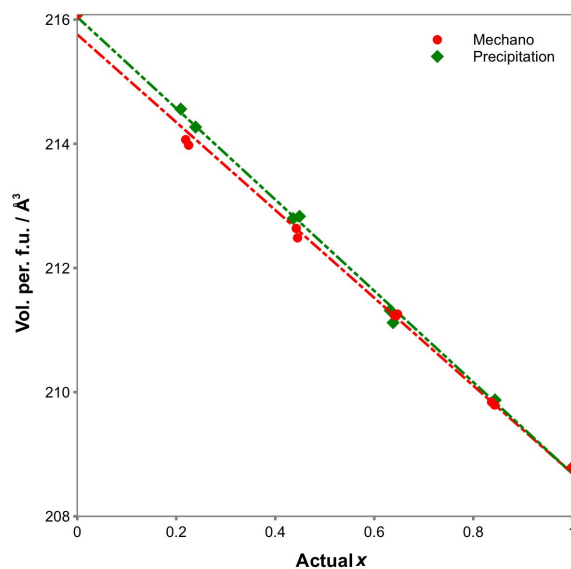

Figure S9. Unit cell volume of cubic (3C) perovskite phases as determined by Rietveld refinement of PXRD data for  $\text{MA}_{1-x}\text{FA}_x\text{PbBr}_3$  samples prepared by mechano- (circles) and precipitation synthesis (diamonds). Values are shown as a function of overall, actual  $x$  as determined by NMR. The dash-dot lines and dash-dot-dot lines are fit of UCV with actual  $x$  of mechano- and precipitation samples, respectively.

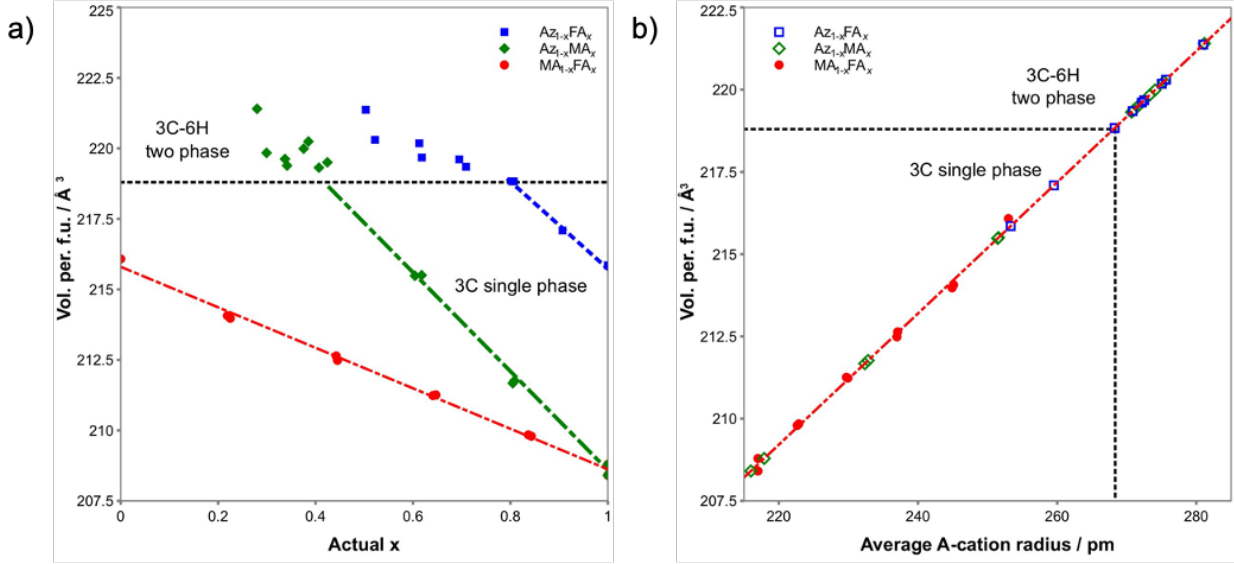

Figure S10. a) Unit cell volume of cubic (3C) perovskite phases as determined by Rietveld refinement of PXRD data for MA<sub>1-x</sub>FA<sub>x</sub>PbBr<sub>3</sub>, AZ<sub>1-x</sub>FA<sub>x</sub>PbBr<sub>3</sub> and AZ<sub>1-x</sub>MA<sub>x</sub>PbBr<sub>3</sub> samples prepared by mechanosynthesis. b) Unit cell volume of cubic (3C) FA/MA perovskite samples plotted with average A-cation radius under the assumption of Vegard's law with  $r_{\text{FA}} = 253$  pm and  $r_{\text{MA}} = 217$  pm<sup>2</sup>. The line is fitted with the results from MA<sub>1-x</sub>FA<sub>x</sub>PbBr<sub>3</sub> and the hollow points from AZ<sub>1-x</sub>FA<sub>x</sub>PbBr<sub>3</sub> and AZ<sub>1-x</sub>MA<sub>x</sub>PbBr<sub>3</sub> samples are added in the figure according to their unit cell volume. Black dotted lines indicate the upper limit cell volume (approx. 219 Å<sup>3</sup> per formula unit) of cubic single-phase solid solution and corresponding average A-cation radius, which separates the 3C single phase region and 3C-6H two-phase region.

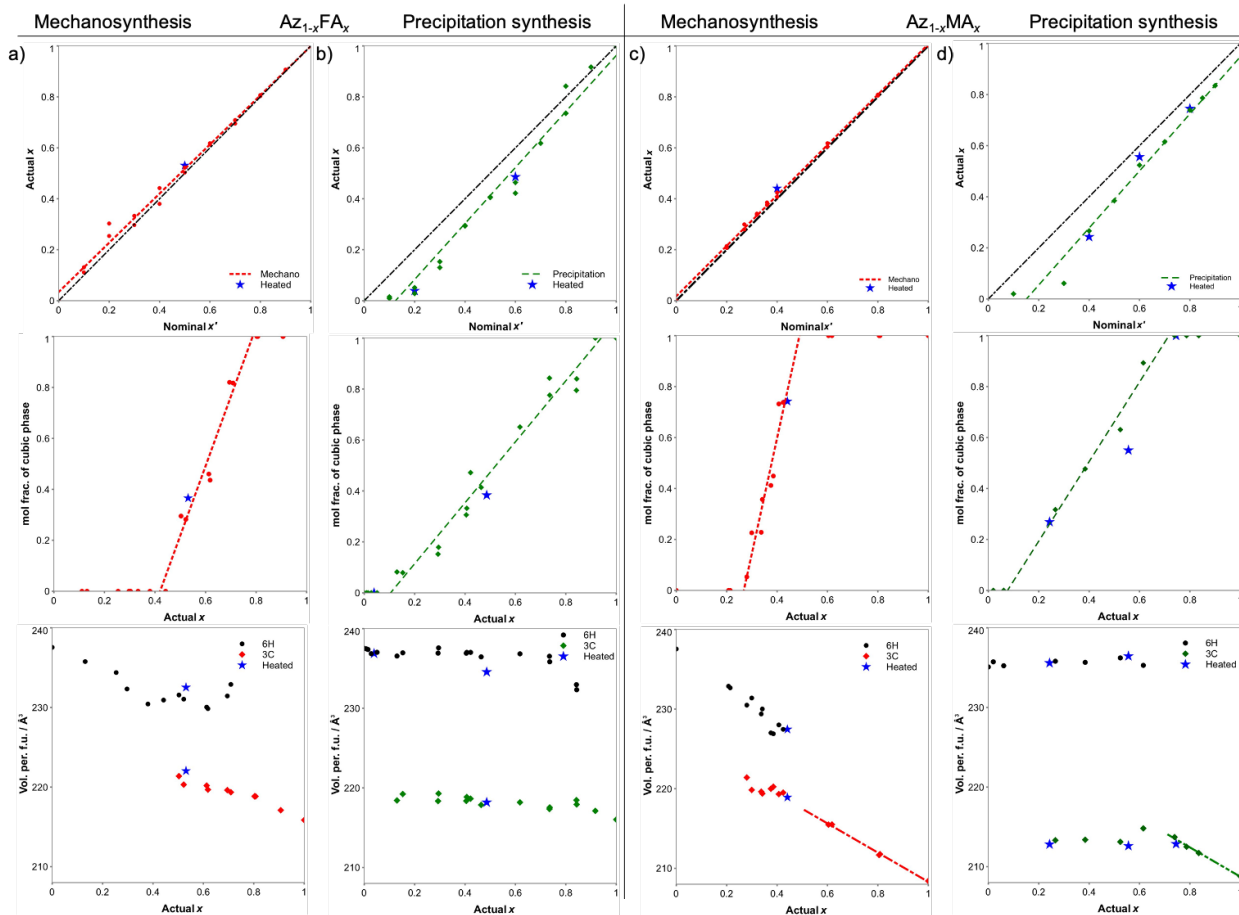

Figure S11. Nominal ( $x'$ ) and actual ( $x$ ) MA<sup>+</sup>/FA<sup>+</sup> cation content determined by <sup>1</sup>H NMR analysis, and mole fraction and cell volume (per formula unit) of hexagonal (6H) and cubic (3C) perovskite phases as determined by Rietveld refinement of PXRD data for heated  $\text{Az}_{1-x}\text{FA}_x\text{PbBr}_3$  (a, b) and  $\text{Az}_{1-x}\text{MA}_x\text{PbBr}_3$  (c, d) samples, prepared by mechano- (a, c) and precipitation synthesis (b, d). The results from heated samples are marked with star.

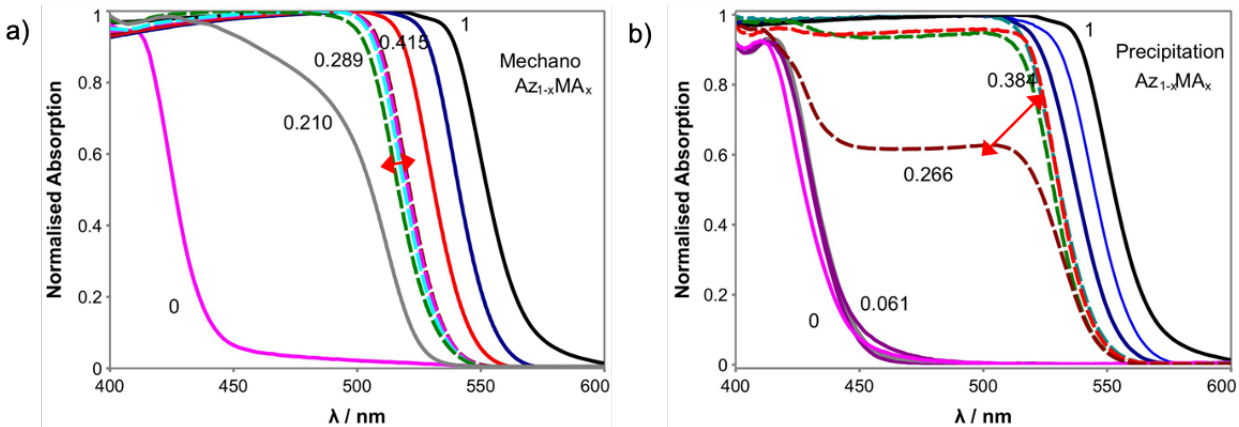

Figure S12. Absorption spectra of  $\text{Az}_{1-x}\text{MA}_x\text{PbBr}_3$  samples prepared by a) mechano-synthesis b) precipitation synthesis. Spectra from single phase (solid solution) compositions as determined by PXRD are plotted with solid lines and multi-phase samples with dashed lines.

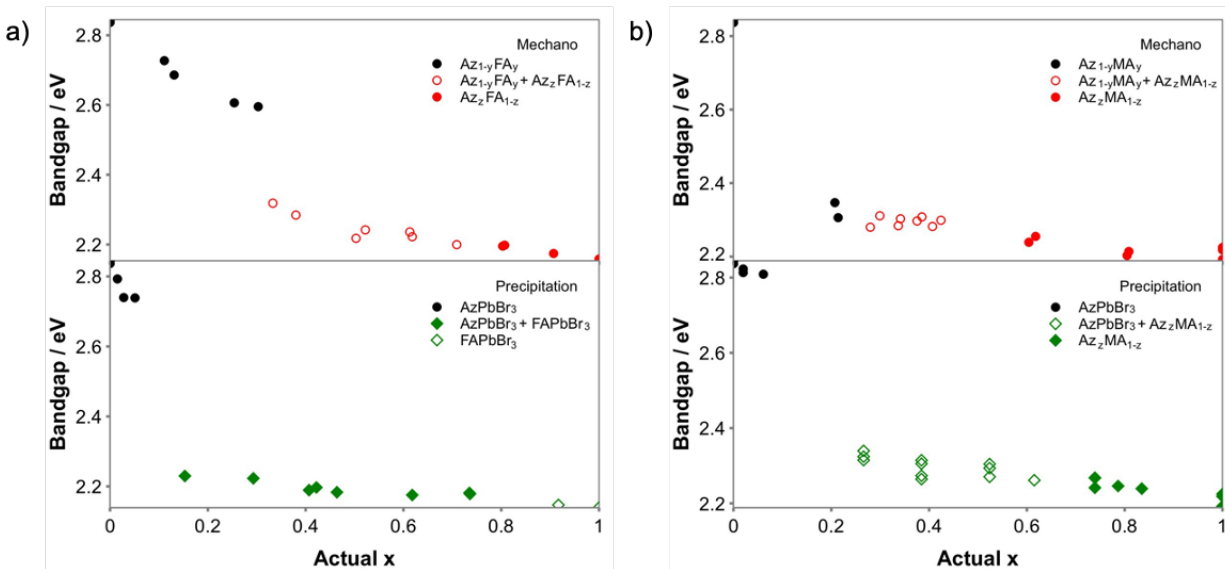

Figure S13. Bandgap determined from the absorption onset in the absorption spectra of a)  $\text{Az}_{1-x}\text{FA}_x\text{PbBr}_3$ ; b)  $\text{Az}_{1-x}\text{MA}_x\text{PbBr}_3$  synthesized from both mechano- and precipitation synthesis.

## References

- (1) Langford, J. I.; Wilson, A. J. C. Scherrer after Sixty Years: A Survey and Some New Results in the Determination of Crystallite Size. *J. Appl. Crystallogr.* **1978**, *11* (2), 102–113.
- (2) Kieslich, G.; Sun, S.; Cheetham, A. K.; Cheetham, T.; Gregor, K.; Shijing, S.; Anthony, K. C. Solid-State Principles Applied to Organic-Inorganic Perovskites: New Tricks for an Old Dog. *Chem. Sci.* **2014**, *5* (12), 4712–4715.
